# Supplementary material
Source: PubMed Central journal article supplement (PMC7247926)
Supplement: NIHMS1579418-supplement-1.pdf [file NIHMS1579418-supplement-1.pdf]

## Supplemental information

### *Lucina pectinata* Oxyhemoglobin (II-III) heterodimer pH susceptibility

Darya Marchany-Rivera<sup>a</sup>, Clyde A. Smith<sup>b</sup>, Josiris D. Rodriguez-Perez<sup>a</sup>, and Juan López Garriga<sup>a\*</sup>

<sup>a</sup>*Department of Chemistry, P.O. Box 9000 University of Puerto Rico, Mayagüez Campus, Puerto Rico 00681.*

<sup>b</sup>*Stanford Linear Accelerator Center (SLAC) National Accelerator Laboratory, 2575 Sand Hill Road, Menlo Park, California 94025, USA*

## Method

### Kinetics and optical absorption

Dissociation of O<sub>2</sub> from HbII-HbIII was determined at pH 5 and 7 by monitoring the decay of the (HbII-HbIII)-O<sub>2</sub> absorption signal at 414 nm, using a SHIMADZU UV-2600 spectrophotometer. Briefly, small volumes (140 µL) of 98 µM (HbII-HbIII)-O<sub>2</sub> solution were mixed rapidly with a large volume of deoxygenated buffer (2 mL) at pH 7 and 5. The kinetic traces, as well as spectra associated with the kinetics, were acquired for a period of 3 hr.

## Results

Figure S1 shows that at pH 5, O<sub>2</sub> dissociation from (HbII-HbIII)-O<sub>2</sub> is near 1.6 times faster by than at pH 7, with  $k_{\text{off}}$  values of 0.0051 s<sup>-1</sup> and 0.0026 s<sup>-1</sup>, respectively. The  $k_{\text{off}}$  results are approximately within the range of the reported values for HbII (0.056 s<sup>-1</sup>) and recombinant HbII (0.053 s<sup>-1</sup>) by Ramos, *et al.*, and HbII (0.011 s<sup>-1</sup>) and HbIII (0.008 s<sup>-1</sup>) by Kraus *et al.*

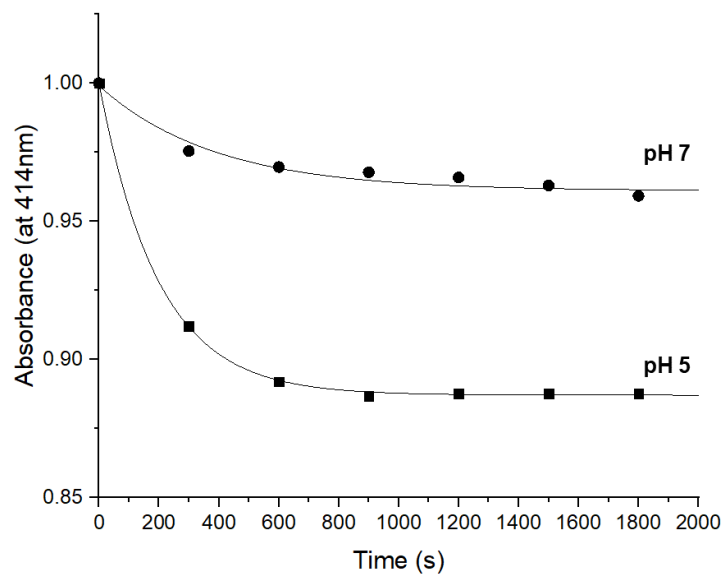

**Figure S1:** Kinetic traces of O<sub>2</sub> dissociation at pH 5 (squares) and 7 (circles).

## References

- C. Ramos, R. Pietri, W. Lorenzo, E. Román, L. B. Granell, C. L. Cadilla, J. López-Garriga, *Protein J.* 29 (2010) 143-151.
- D. Kraus, J.B. Wittenberg, *J. Biol. Chem.* 265 (1990) 16043–16053.
